# Supplementary material
Source: MDPI journal article supplement (https://www.mdpi.com/2304-6767/10/7/133)
Supplement: s1 [file s1]

## *Supplementary Materials*

### **1 Supplementary Tables**

**Table S1.** Billing codes for periodontal treatment according to the German uniform assessment standard for dental services (BEMA) [26].

| <b>BEMA</b> | <b>Description</b>                                                                                                                   |
|-------------|--------------------------------------------------------------------------------------------------------------------------------------|
| P200        | Systematic treatment of periodontal diseases (supra- and subgingival debridement), closed procedure per treated single-rooted tooth. |
| P201        | Systematic treatment of periodontal diseases (supra- and subgingival debridement), closed procedure per treated multi-rooted tooth.  |
| P202        | Systematic treatment of periodontal disease (surgical therapy), open procedure per treated single-rooted tooth.                      |
| P203        | Systematic treatment of periodontal diseases (surgical therapy), open procedure per treated multi-rooted tooth.                      |
| 108         | Grinding in of the natural dentition for masticatory plane compensation and relief, per session.                                     |
| 111         | Follow-up treatment as part of the systemic treatment of periodontal diseases, per session.                                          |

**Table S2.** Distribution of covariates after log transformation of costs and reweighting the data incl. standardized differences, differentiated by those exposed and unexposed to periodontal treatment.

|                                             |                        | Periodontal treatment |                 | Standardized differences |
|---------------------------------------------|------------------------|-----------------------|-----------------|--------------------------|
|                                             |                        | Exposed group         | Unexposed group |                          |
| Sex, n (%)                                  | Men                    | 62.5                  | 60.7            | -0.0375                  |
|                                             | Women                  | 37.5                  | 39.3            |                          |
| Age, mean (SD)                              |                        | 63 (48)               | 65 (13)         | -0.0436                  |
| Nielsen region, n (%)                       | Bavaria                | 13.7                  | 13.8            | 0.028                    |
|                                             | Baden-Württemberg      | 12.5                  | 11.9            |                          |
|                                             | Centre                 | 15.6                  | 16.3            |                          |
|                                             | North (West)           | 13.2                  | 13.1            |                          |
|                                             | North Rhine-Westphalia | 36.4                  | 36.4            |                          |
|                                             | East (North)           | 6.1                   | 5.9             |                          |
|                                             | East (South)           | 2.7                   | 2.6             |                          |
| Dental visit pre, n (%)                     | Yes                    | 72.0                  | 70.4            | 0.0352                   |
|                                             | No                     | 28.0                  | 29.6            |                          |
| Charlson comorbidity index, mean (SD)       |                        | 2.0 (9.1)             | 2.0 (2.0)       | -0.0057                  |
| Physician group visits pre, mean (SD)       |                        | 5.0 (14.0)            | 5.0 (3.0)       | 0.0103                   |
| Total healthcare costs pre (log), mean (SD) |                        | 6.8 (7.2)             | 6.8 (1.8)       | -0.0047                  |

SD: standard deviation. Pre: one year before index quarter. Total healthcare costs pre: sum of inpatient, outpatient, drug costs, costs of remedies/medical aids. Percentage values are rounded to the first decimal place.

**Table S3.** Average treatment effect (ratio of geometric means) in patients newly diagnosed with CHD, all models.

|                        | Simple regression | Inverse probability weighting | Regression adjustment (Poisson) | Doubly robust method |
|------------------------|-------------------|-------------------------------|---------------------------------|----------------------|
|                        | ATE (95% CI)      | ATE (95% CI)                  | ATE (95% CI)                    | ATE (95% CI)         |
| Total healthcare costs | 0.87 (0.80, 0.95) | 0.96 (0.93, 1.00)             | 0.99 (0.91, 1.08)               | 0.98 (0.90, 1.06)    |
| Inpatient costs        | 0.72 (0.57, 0.92) | 0.79 (0.71, 0.87)             | 0.82 (0.62, 1.07)               | 0.79 (0.61, 1.04)    |
| Outpatient costs       | 0.98 (0.93, 1.04) | 1.06 (1.03, 1.08)             | 1.07 (1.01, 1.13)               | 1.07 (1.01, 1.13)    |
| Drug Costs             | 0.80 (0.73, 0.87) | 0.93 (0.90, 0.97)             | 0.96 (0.88, 1.05)               | 0.95 (0.87, 1.04)    |

ATE: average treatment effect. CI: confidence interval. Total healthcare costs: sum of inpatient costs, outpatient costs, and drug costs.

## 2 Supplementary Reference

26. Kassenzahnärztliche Bundesvereinigung (KZBV); Spitzenverband Bund der Krankenkassen (GKV-Spitzenverband). *Einheitlicher Bewertungsmaßstab für zahnärztliche Leistungen gemäß § 87 Abs. 2 und 2h SGB V (BEMA): Anlage A zum Bundesmantelvertrag - Zahnärzte (BMV-Z)*; Germany: Cologne, Berlin, 2019.
